# Supplementary material for: Plasmid stability analysis based on a new theoretical model employing stochastic simulations
Source: PubMed Central journal article supplement (PMC5573283; doi:10.1371/journal.pone.0183512), 2017-08-28
Supplement: pone.0183512.s002.pdf [file pone.0183512.s002.pdf]

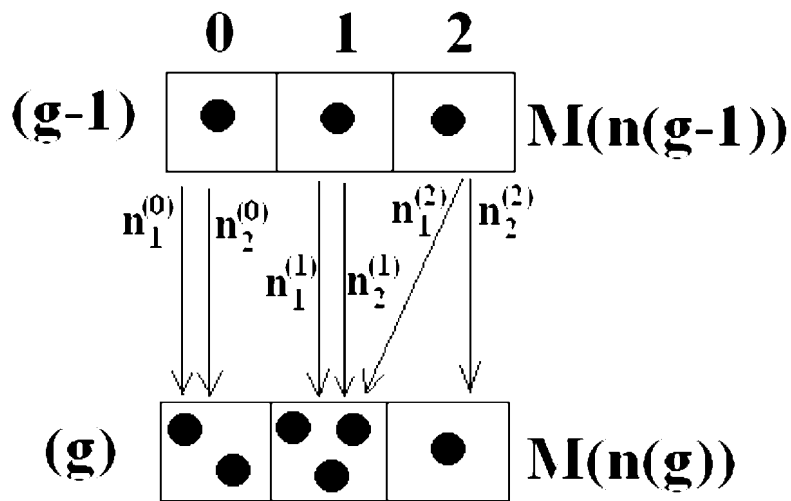

Figure S2. Principle of the method used to calculate the number of cells for a given population. Initially, at (g-1) generation there are three cells, with  $n=2$ ,  $n=1$ , and  $n=0$ , where  $n$  indicates plasmid copy number. In the next generation (g) due to random processes, there will be 6 newborn cells, one with  $n=2$ , three cells with  $n=1$  and two cells with  $n=0$
