# Supplementary material for: Plasmid stability analysis based on a new theoretical model employing stochastic simulations
Source: PubMed Central journal article supplement (PMC5573283; doi:10.1371/journal.pone.0183512), 2017-08-28
Supplement: pone.0183512.s003.pdf [file pone.0183512.s003.pdf]

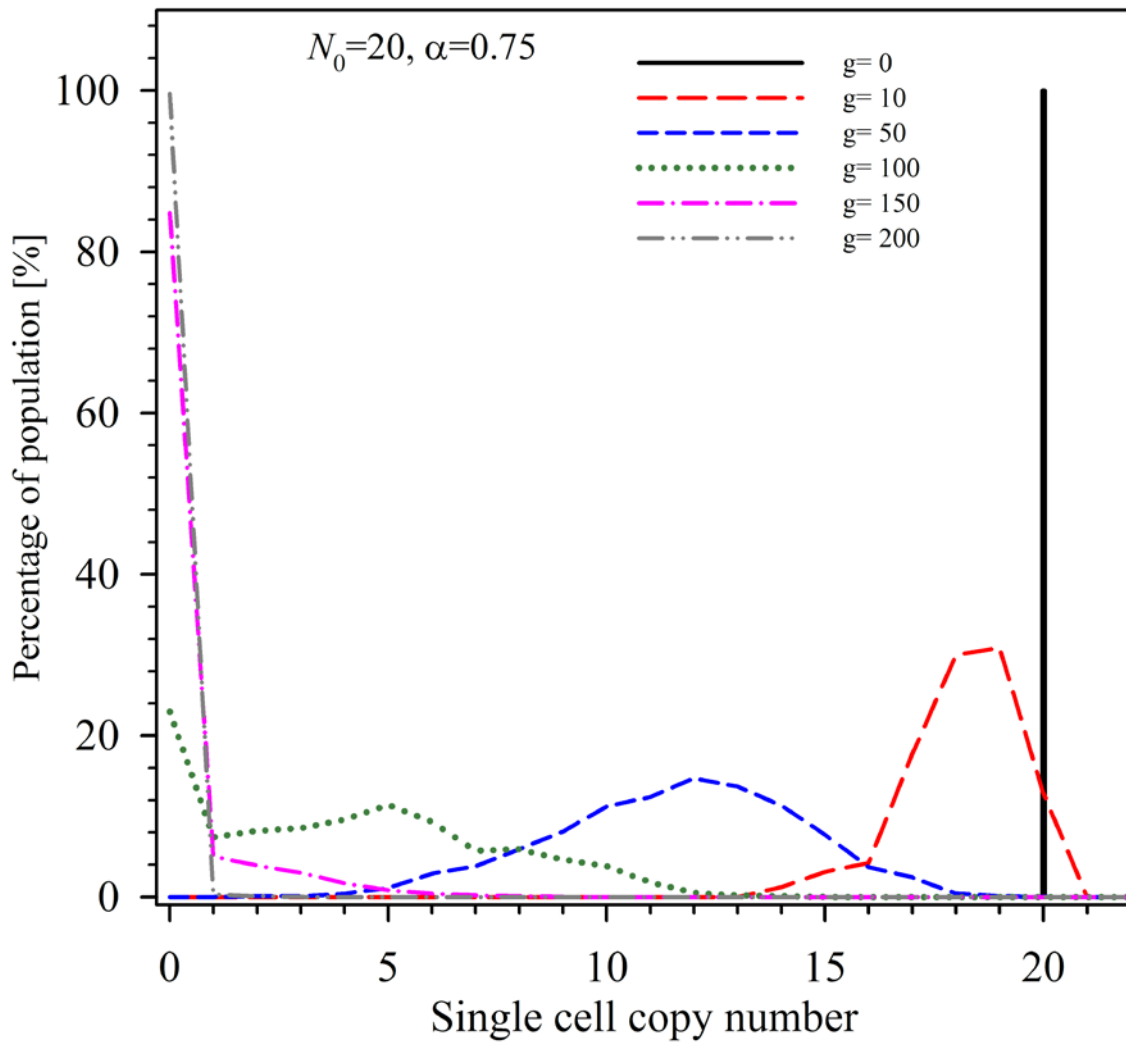

Figure S3. Distribution of PCN in bacterial population after 0, 10, 50, 100, 150 and 200 generations. Initial PCN distribution is derived from equation (9), and  $N_0=20$  and  $\alpha=0.75$  values were adopted.
