# Supplementary material for: Plasmid stability analysis based on a new theoretical model employing stochastic simulations
Source: PubMed Central journal article supplement (PMC5573283; doi:10.1371/journal.pone.0183512), 2017-08-28
Supplement: pone.0183512.s005.pdf [file pone.0183512.s005.pdf]

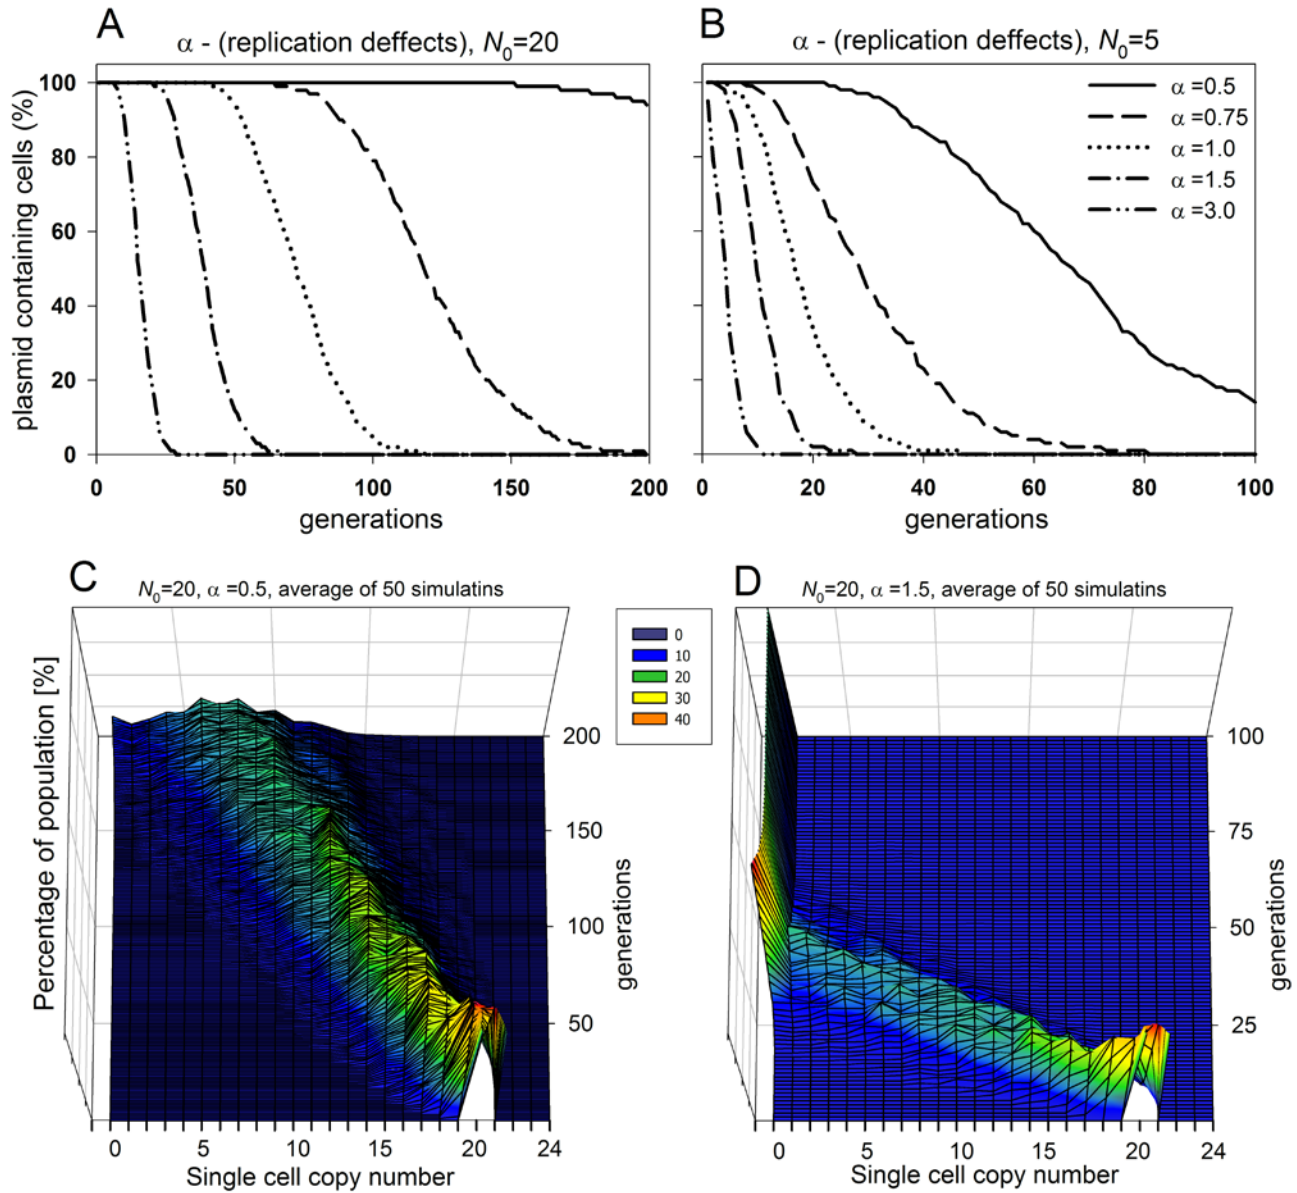

Figure S5. Average results of 50 simulations performed for the plasmid containing cells, employing different values of the  $\alpha$  parameter which describes probability of the stochastic emergence of plasmid units defective in replication. The initial parameters are: uniform distribution described by Eq. 9 with (Panel A)  $N_0=20$  and (Panel B)  $N_0=5$  ( $\delta=0$ ). The 3-D plots show distribution of a single cell copy number in a bacterial population for the following parameters:  $N_0=20$  and  $\alpha=0.5$  (C) and  $\alpha=1.5$  (D).
