# Supplementary material for: Plasmid stability analysis based on a new theoretical model employing stochastic simulations
Source: PubMed Central journal article supplement (PMC5573283; doi:10.1371/journal.pone.0183512), 2017-08-28
Supplement: pone.0183512.s006.pdf [file pone.0183512.s006.pdf]

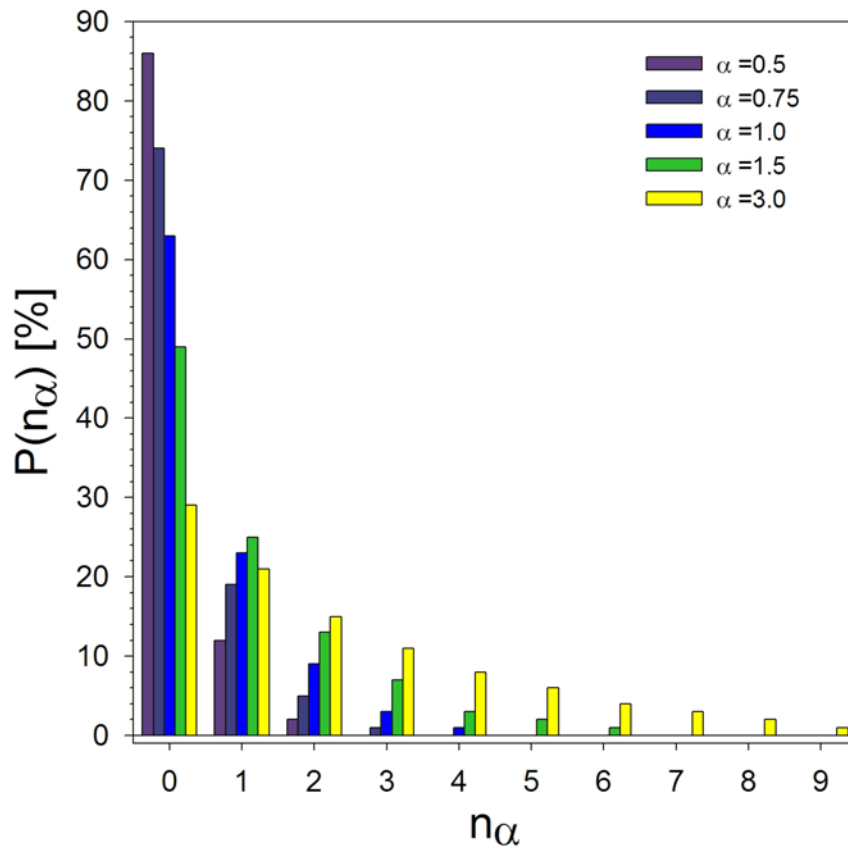

Figure S6. Probability distribution of replication-defective plasmid units ( $n_\alpha$ ) calculated for different values of the  $\alpha$  parameter.
