# Supplementary material for: Plasmid stability analysis based on a new theoretical model employing stochastic simulations
Source: PubMed Central journal article supplement (PMC5573283; doi:10.1371/journal.pone.0183512), 2017-08-28
Supplement: pone.0183512.s007.pdf [file pone.0183512.s007.pdf]

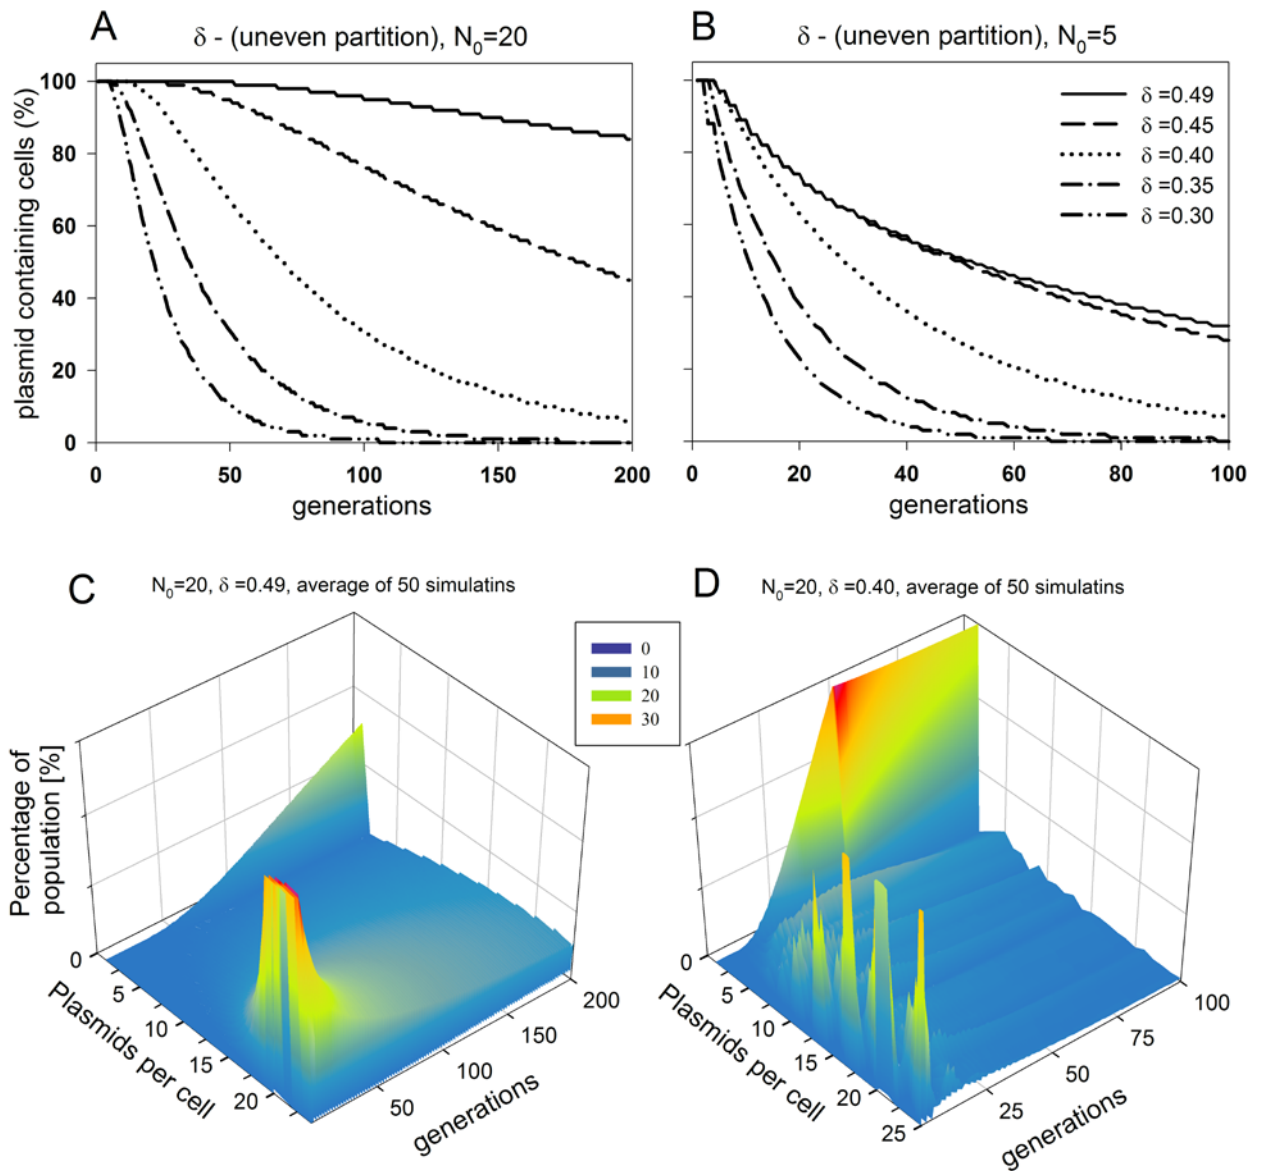

Figure S7. Average results of 50 simulations performed for the plasmid containing cells, employing different values of the  $\delta$  parameter, which describes uneven segregation of plasmid units between daughter cells. The initial parameters are: uniform distribution described by Eq. 9 with  $N_0=20$  (Panel A) and  $N_0=5$  (Panel B) ( $\alpha=0$ ). The 3-D plots show distribution of a single cell copy number in a bacterial population for the following parameters:  $N_0=20$  and  $\delta=0.49$  (C) and  $\delta=0.40$  (D).
