# Supplementary material for: Plasmid stability analysis based on a new theoretical model employing stochastic simulations
Source: PubMed Central journal article supplement (PMC5573283; doi:10.1371/journal.pone.0183512), 2017-08-28
Supplement: pone.0183512.s010.pdf [file pone.0183512.s010.pdf]

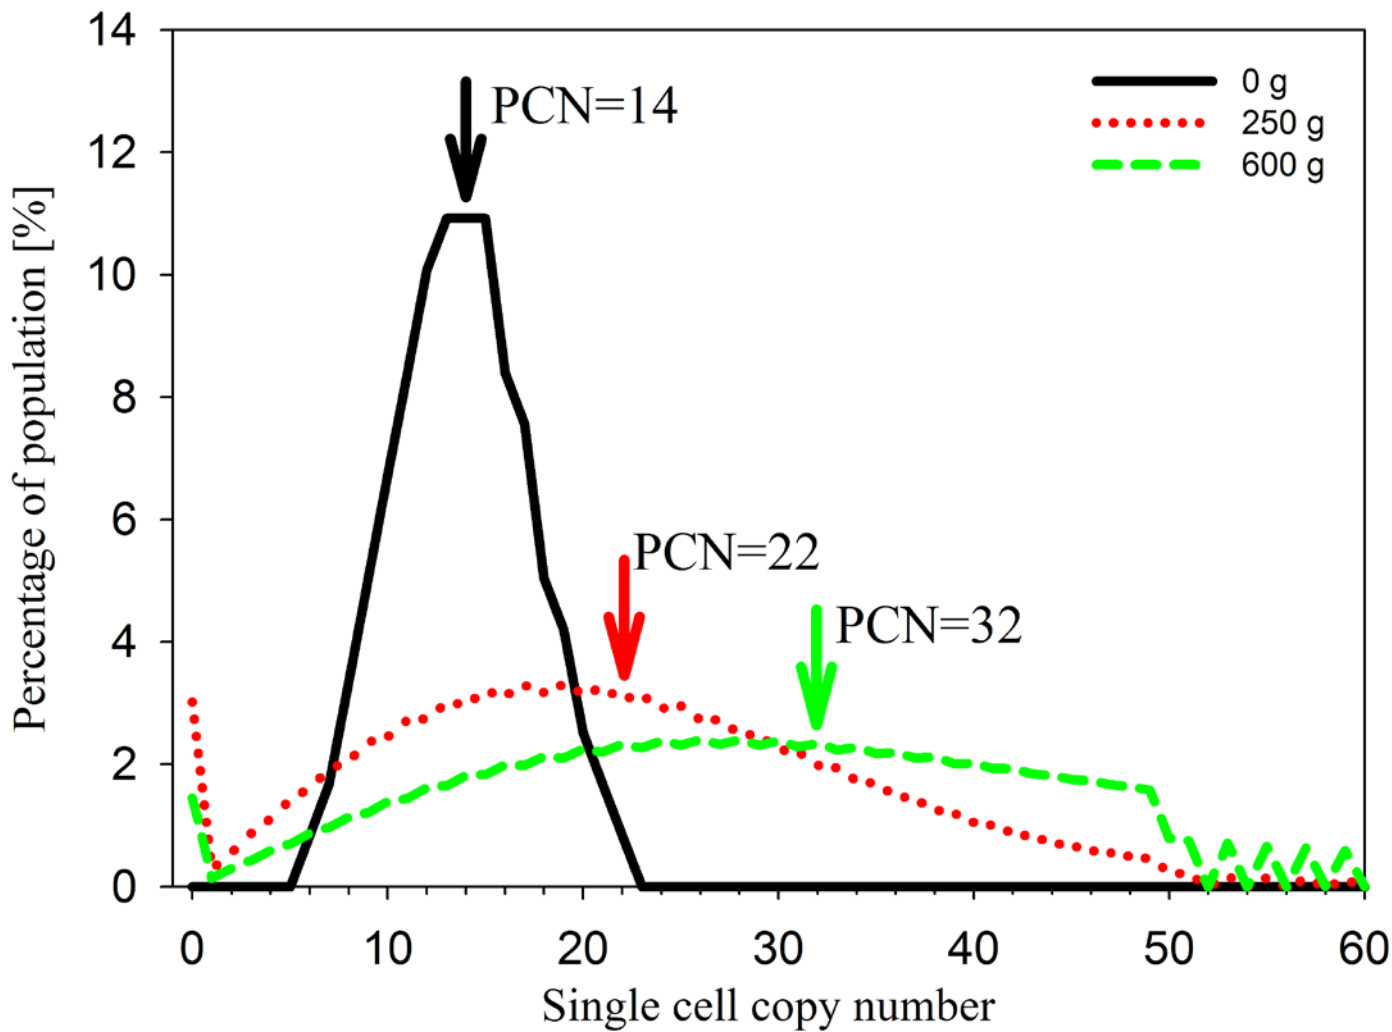

Figure S10. Calculated distributions of pIB8 plasmid copy number in *E. coli* MG1655 bacterial population after 0, 250 and 600 generations. Initial parameters are the same as in Fig. 2A,  $N_0=14$  and  $\delta=0.49$  values were adopted. Vertical arrows indicate an average of plasmid copy numbers determined for each distribution.
